# Supplementary material for: The Anti-Inflammatory Effect of Lactose-Modified Hyaluronic Acid Molecules on Primary Bronchial Fibroblasts of Smokers
Source: MDPI journal article supplement (doi:10.3390/polym15071616), 2023-03-24
Supplement: s1 [file s1]

## Supplementary Materials

# The Anti-Inflammatory Effect of Lactose-Modified Hyaluronic Acid Molecules on Primary Bronchial Fibroblasts of Smokers

Alice Donato <sup>1</sup>, Federico Fontana <sup>2</sup>, Rina Venerando <sup>3</sup>, Antonino Di Stefano <sup>4</sup> and Paola Brun <sup>1,\*</sup>

<sup>1</sup> Histology Unit, Department of Molecular Medicine, University of Padova, 35121 Padova, Italy

<sup>2</sup> Center for Nanomedicine and Tissue Engineering, A.S.S.T. Grande Ospedale Metropolitano Niguarda, Piazza dell'Ospedale Maggiore 3, 20162 Milan, Italy

<sup>3</sup> Department of Molecular Medicine, University of Padova, 3521 Padova, Italy

<sup>4</sup> Divisione di Pneumologia e Laboratorio di Citoimmunopatologia dell'Apparato Cardio Respiratorio, Istituti Clinici Scientifici Maugeri, IRCCS, 28013 Gattico-Veruno (NO), Italy

\* Correspondence: [paola.brun@unipd.it](mailto:paola.brun@unipd.it)

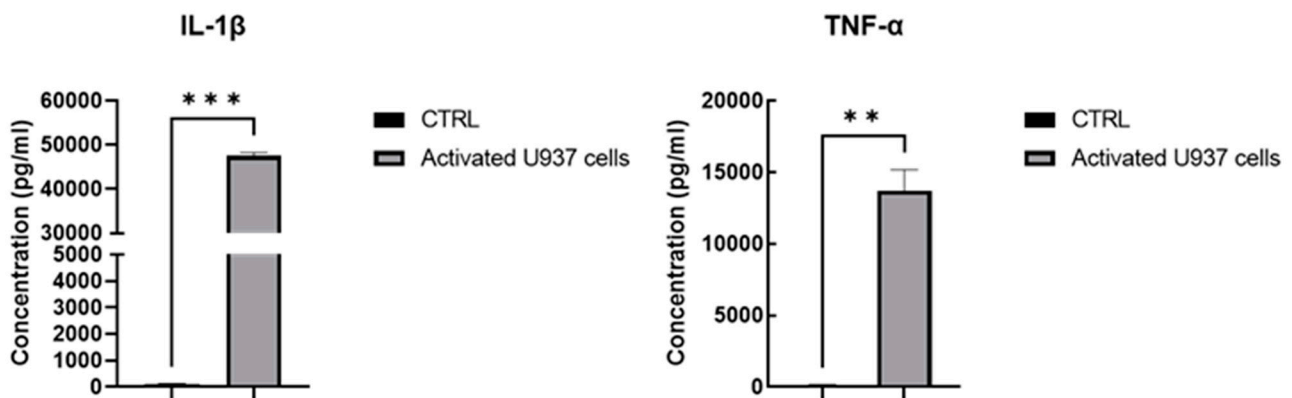

**Scheme S1.** Detection of IL-1 $\beta$  and TNF- $\alpha$  in activated U937 human monocytes. After 48 hours of PMA and 1 hour of LPS treatment, protein expression of IL-1 $\beta$  and TNF- $\alpha$  cytokines was measured using ELISA after 24 hours. The data are presented as mean  $\pm$  SE of three independent experiments. The unpaired Student's t-test is used to calculate statistical differences. \*\*P<0.01, \*\*\*P<0.001 when compared to untreated cells.

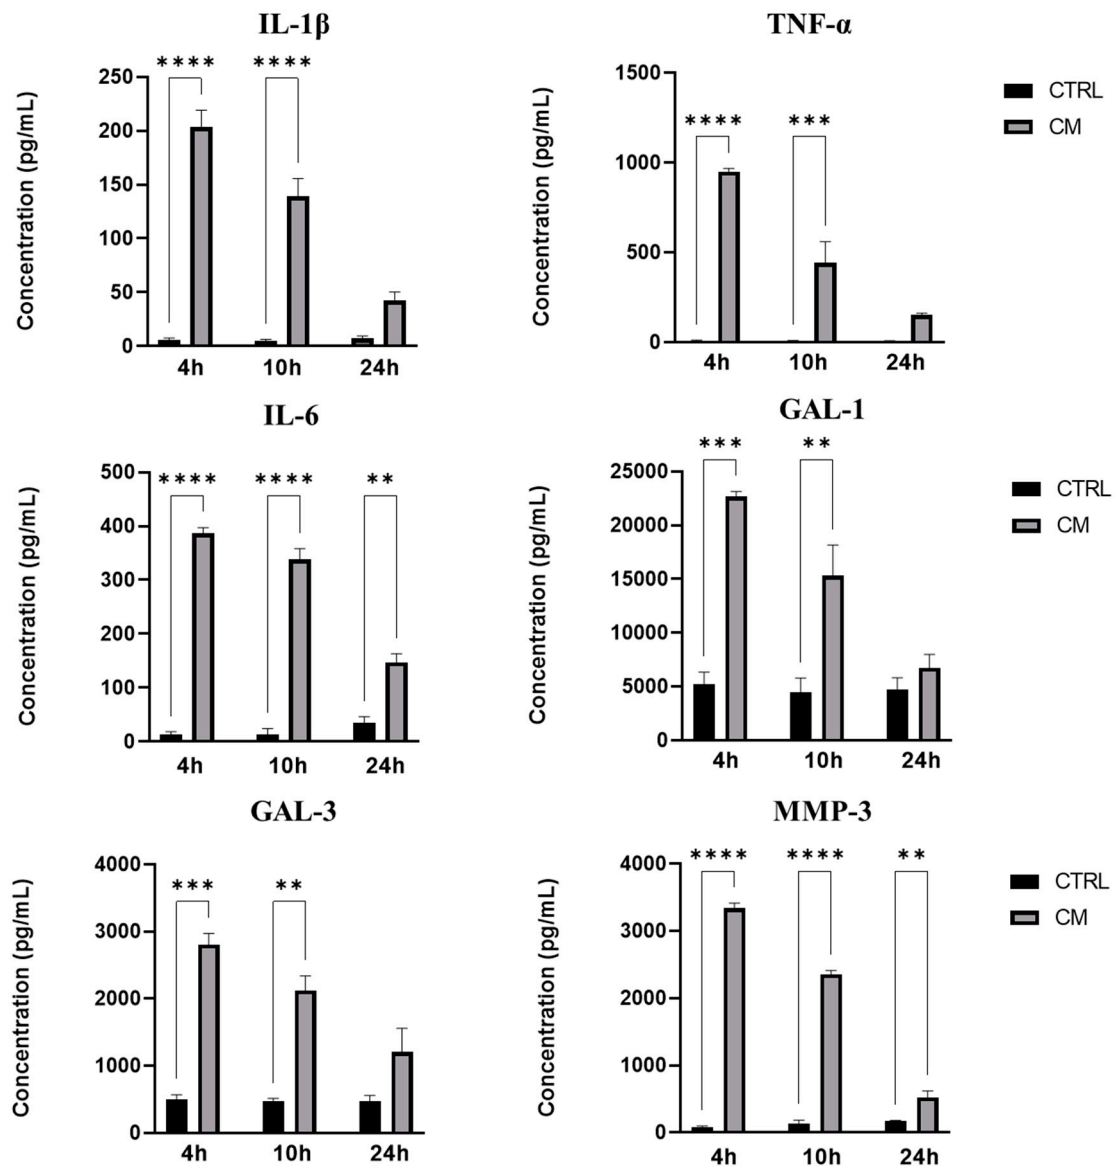

**Scheme S2.** Inflammatory molecules expression by activated U937 cells (ELISA). After 24h of exposure to CM of activated U937, primary human bronchial fibroblasts were *in vitro* cultivated for 4, 10 and 24 h. Pro-inflammatory molecules, galectins and MMP-3 protein expression were tested by ELISA analysis. Data from three independent experiments are presented as mean standard error (SE). Statistical differences based on unpaired Student's t-test. \*\*  $p < 0.01$ , \*\*\*  $p < 0.001$  and \*\*\*\*  $p < 0.0001$ .
